# Supplementary material for: KrakenUniq: confident and fast metagenomics classification using unique k-mer counts
Source: PubMed Central journal article supplement (PMC6238331; doi:10.1186/s13059-018-1568-0), 2018-11-16
Supplement: 13059_2018_1568_MOESM3_ESM.pdf [file 13059_2018_1568_MOESM3_ESM.pdf]

Table S8: Sequencing depth and k-mer count threshold from Figure 4.

| No. of reads | Fraction | Genus     |        | Species   |        |
|--------------|----------|-----------|--------|-----------|--------|
|              |          | Threshold | Recall | Threshold | Recall |
| 1 million    | 0.03     | 2555      | 0.87   | 3682      | 0.80   |
| 2 million    | 0.06     | 4483      | 0.86   | 6152      | 0.81   |
| 5 million    | 0.15     | 12723     | 0.87   | 10459     | 0.85   |
| 10 million   | 0.3      | 21896     | 0.88   | 21201     | 0.85   |
| 20 million   | 0.6      | 43417     | 0.88   | 43417     | 0.84   |
| 34.3 million | 1        | 69847     | 0.89   | 688842    | 0.85   |
